# Supplementary material for: Identification of Cis-Acting Elements on Positive-Strand Subgenomic mRNA Required for the Synthesis of Negative-Strand Counterpart in Bovine Coronavirus
Source: PubMed Central journal article supplement (PMC4147681; doi:10.3390/v6082938), 2014-07-30

# Supplementary Materials

## Identification of *Cis*-Acting Elements on Positive-Strand Subgenomic mRNA Required for the Synthesis of Negative-Strand Counterpart in Bovine Coronavirus

Po-Yuan Yeh and Hung-Yi Wu

**Table S1.** Oligonucleotides used in this study

| Oligonucleotide <sup>a</sup> | Polarity <sup>b</sup> | Sequence (5' → 3')                                 | Position                 |
|------------------------------|-----------------------|----------------------------------------------------|--------------------------|
| pGEMNDEI(-) <sup>c</sup>     | +                     | GAGAGTGCACCATATG                                   |                          |
| ΔNL (+)                      | -                     | GACATCCTTAAAGTTTAGACCCTATAGTGAGTCGTATTAC           |                          |
| ΔSLI (+)                     | -                     | TAAAAAGATCTAACAAGAGACTATAGTGAGAGTCGTATTACA         |                          |
| ΔSLII (+)                    | -                     | CCTTAAAGTTTAGATCAGTGAAGCGGGATG                     |                          |
| sΔB(+)                       | -                     | CAAGACATCCATTCTGAATATTTCTGAGGTGTC                  |                          |
| sΔP (+)                      | -                     | CTAATTGATACAGGGTTGTCCTATCCCGACTTTC                 |                          |
| s3' Δ15 (+)                  | -                     | ACGCGTTTTTTTTTTTTTTTTTTTTTTTTTTGGCCATGATCAACTTC    |                          |
| s3' Δ55 (+)                  | -                     | ACGCGTTTTTTTTTTTTTTTTTTTTTTTTTTAATAGTACCCTGATGTG   |                          |
| s3' Δ55-45 (+)               | -                     | CATTCATTTACTAGGAATAGTACCCTGATGTGAGC                |                          |
| s3' Δ55-40 (+)               | -                     | CTTCATTCATTTAAATAGTACCCTGATGTGAGC                  |                          |
| s3' Δ55-30 (+)               | -                     | GGCCATGATCAACTAATAGTACCCTGATGTGAGC                 |                          |
| s3' Δ30-15 (+)               | -                     | GTGATTCTTCCAATTCATTCATTTACTAGGGC                   |                          |
| sgmA' (+)                    | -                     | ACGCGTTTTTTTTTTTTTTTTTTTTTTTTTTGATTCTTCCAATTGGCC   |                          |
| sgmU' (+)                    | -                     | ACGCGTTTTTTTTTTTTTTTTTTTTTTTTTTATGATTCTTCCAATTGGCC |                          |
| sgmG' (+)                    | -                     | ACGCGTTTTTTTTTTTTTTTTTTTTTTTTTTCTGATTCTTCCAATTGGCC |                          |
| leader20(-)                  | +                     | GATTGTGAGCGATTGCGTG                                | 1-20 <sup>d</sup>        |
| M(+)                         | -                     | GTTCCATTCTTTAGGAATTTAATAG                          | 28746-28771 <sup>d</sup> |
| M3 (-)                       | +                     | GGGTCTGGCATGGACACCGC                               | 29345-29365 <sup>d</sup> |
| MHV3'UTR 3 (-)               | +                     | GTCCTACGTCTAACCATAAGAACG                           | 31213-31236 <sup>e</sup> |
| MHV3'UTR 6 (-)               | +                     | CCTGGGAAGAGCTCACATCAGG                             | 31250-31271 <sup>e</sup> |
| BCV 23-40 (+)                | -                     | CCCGCTTCACTGATCTCT                                 | 23-40 <sup>d</sup>       |
| BCV 29-54 (+)                | -                     | GATCTAACAAGAGTCAGTGAAGCG                           | 29-54 <sup>d</sup>       |
| TGEV 7 (-)                   | +                     | TCTGGGTTGCCAAGGATGGTGCCATG                         | 1098-1123 <sup>f</sup>   |
| TGEV 8 (+)                   | -                     | CATGGCACCATCCTTGGCAACCCAGA                         | 1098-1123 <sup>f</sup>   |
| DI reverse (+) <sup>c</sup>  | -                     | CACAGGAAACAGCTATGACC                               |                          |
| BCVN (+)                     | -                     | CCAGAACGATTTCCAAAGGACGCTCT                         | 29430-29455 <sup>d</sup> |
| 18SrRNA (+)                  | -                     | GCCTGCTGCCTCCTTGGATCTGGTAGCC                       | 552-580 <sup>g</sup>     |
| 18SrRNA (-)                  | +                     | CCCATTGGAACGCTGCCCCTATC                            | 440-463 <sup>g</sup>     |
| MHV3'UTR2 (+)                | -                     | CCTATCGCCGTTCTTATGGTTAGACG                         | 31219-31244 <sup>e</sup> |
| Taqman probe-5 (-)           | +                     | TGAGCGATTGCGTGCG                                   | 6-22 <sup>d</sup>        |
| Taqman probe-3 (-)           | +                     | TAACCATAAGAACGGCGATAGGCGC                          | 31223-31247 <sup>e</sup> |
| MHV3'UTR-DR(-)               | +                     | GATTGCAAAATAGAGAATGTG                              | 31175-31197 <sup>e</sup> |
| MHV3'UTR-DR(+)               | -                     | AATAGTACCCTGATGTGA                                 | 31262-31279 <sup>e</sup> |

<sup>a</sup> The positive and negative symbols in the oligonucleotide names indicate the polarities of the nucleic acids to which the oligonucleotides anneal. Oligonucleotides named with a negative symbol used for mutagenesis in the text have a sequence complementary to a positive-sense oligonucleotide of the same name. <sup>b</sup> Polarity of the oligonucleotide relative to the positive-strand viral genome. <sup>c</sup> Indicates the oligonucleotide which anneals to pGEM3Zf(-) vector (Promega). <sup>d</sup> BCoV-Mebus: GenBank accession number U00735.2; <sup>e</sup> MHV-A59: GenBank accession number NC\_001846.1; <sup>f</sup> Indicates the reporter sequence in BCoV DI RNA which anneals to oligonucleotide; <sup>g</sup> 18S rRNA: GenBank accession number M10098.1.

**Figure S1.** Comparison of the efficiency of the (–)-strand RNA synthesis between sgmRNA 7 and BCoV DI RNA without the strategy of head-to-tail ligation. **(A)** RT-PCR product was observed from BCoV-infected and BM25A- or sBM25A-transfected cells (lanes 2 and 3) but not from control groups: lane 4, total cellular RNA from mock-infected cells; lane 5, total cellular RNA from BCoV-infected and mock-transfected cells. RT-PCR products of ~100 bp were also observed from mock-infected and BM25A- or sBM25A-transfected cells (lanes 6 and 7). **(B)** The relative efficiency of (–)-strand RNA synthesis from constructs BM25A and sBM25A, as measured by RT-qPCR without the step of head-to-tail ligation. Control A: total cellular RNA from mock-infected cells. Control B: total cellular RNA from BCoV-infected cells. Control C: total cellular RNA from BM25A-transfected mock-infected cells. Control D: total cellular RNA from sBM25A-transfected mock-infected cells. M (lanes 1 and 8), ds DNA size markers in nt pairs. The values **(B)** represent the mean±SD of three individual experiments. \*  $p < 0.05$ .

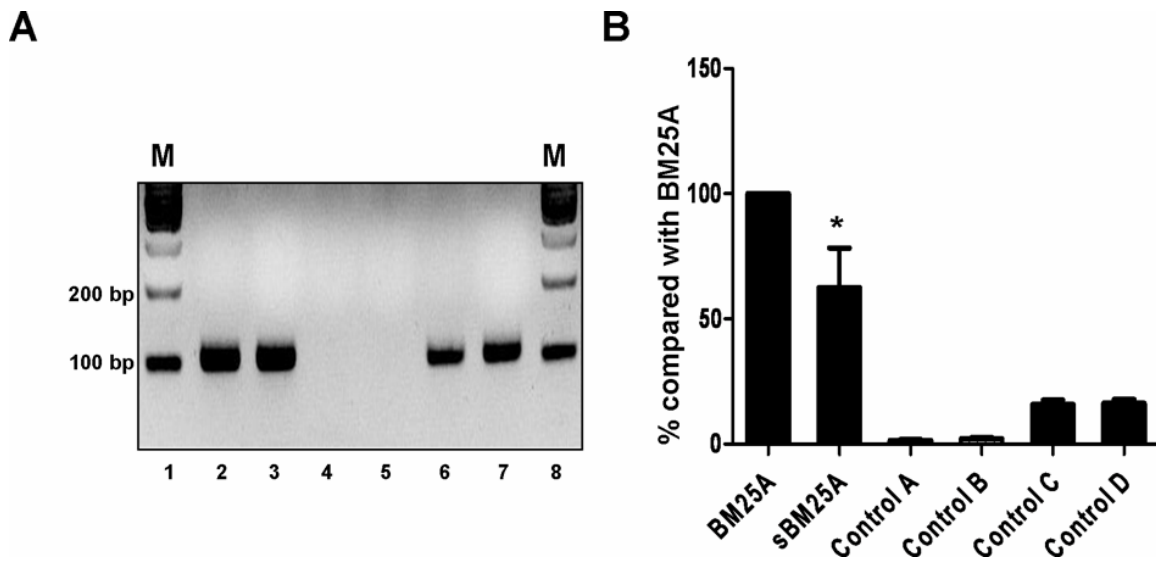

**Figure S2.** Analysis of the positive-strand RNA synthesis at 48 hpi of VP1 by Northern blot assay with 18S rRNA and M sgmRNA as internal controls.

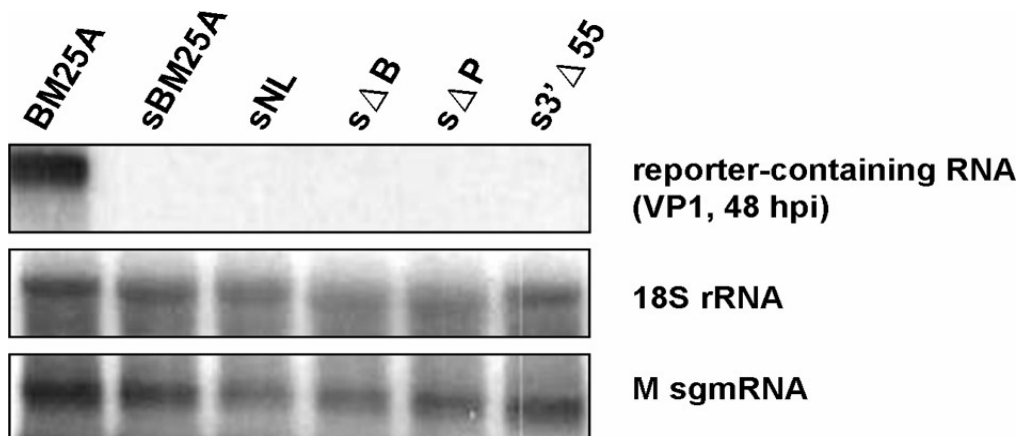

Supplement: viruses-06-02938-s001.pdf [file viruses-06-02938-s001.pdf]
